# Supplementary material
Source: Research Square preprint supplement (doi:10.21203/rs.3.rs-9568200/v1)
Supplement: Supplementary file 1 [file 54a72196dddadd0e0dbea1cc.pdf]

**Table S1** Summary of trial locations, planting dates, sensing dates, and harvest dates used in this study.

| Trial | Year | State | Site        | Planting date | Sensing date | Harvest date |
|-------|------|-------|-------------|---------------|--------------|--------------|
| 1     | 2014 | IA    | Ames        | 2014-05-07    | 2014-06-26   | 2014-10-17   |
| 2     | 2014 | IA    | MasonCity   | 2014-05-09    | 2014-07-09   | 2014-10-16   |
| 3     | 2014 | IL    | Brownstown  | 2014-04-24    | 2014-06-13   | 2014-10-01   |
| 4     | 2014 | IL    | Urbana      | 2014-04-25    | 2014-06-15   | 2014-09-29   |
| 5     | 2014 | IN    | Loam        | 2014-05-19    | 2014-06-27   | 2014-10-21   |
| 6     | 2014 | IN    | Sand        | 2014-05-19    | 2014-06-27   | 2014-10-22   |
| 7     | 2014 | MN    | NewRichland | 2014-05-21    | 2014-07-07   | 2014-10-22   |
| 8     | 2014 | MN    | StCharles   | 2014-05-16    | 2014-07-08   | 2014-10-28   |
| 9     | 2014 | MO    | Bay         | 2014-05-02    | 2014-06-20   | 2014-09-14   |
| 10    | 2014 | MO    | Troth       | 2014-05-02    | 2014-06-21   | 2014-09-14   |
| 11    | 2014 | ND    | Amenia      | 2014-05-23    | 2014-07-10   | 2014-10-01   |
| 12    | 2014 | ND    | Durbin      | 2014-05-23    | 2014-07-10   | 2014-10-15   |
| 13    | 2014 | NE    | Brandes     | 2014-04-19    | 2014-06-26   | 2014-10-03   |
| 14    | 2014 | NE    | SCAL        | 2014-05-07    | 2014-06-24   | 2014-10-22   |
| 15    | 2014 | WI    | Steuben     | 2014-05-07    | 2014-06-25   | 2014-11-05   |
| 16    | 2014 | WI    | Wauzeka     | 2014-05-06    | 2014-06-25   | 2014-11-05   |
| 17    | 2015 | IA    | Boone       | 2015-05-18    | 2015-07-07   | 2015-10-08   |
| 18    | 2015 | IA    | Lewis       | 2015-04-29    | 2015-07-07   | 2015-10-04   |
| 19    | 2015 | IL    | Brownstown  | 2015-04-28    | 2015-06-16   | 2015-09-23   |
| 20    | 2015 | IL    | Urbana      | 2015-04-23    | 2015-06-15   | 2015-09-24   |
| 21    | 2015 | IN    | Loam        | 2015-04-29    | 2015-06-17   | 2015-10-22   |
| 22    | 2015 | IN    | Sand        | 2015-04-29    | 2015-06-17   | 2015-10-22   |
| 23    | 2015 | MN    | NewRichland | 2015-04-18    | 2015-06-26   | 2015-10-08   |
| 24    | 2015 | MN    | StCharles   | 2015-05-01    | 2015-07-01   | 2015-10-20   |
| 25    | 2015 | MO    | LoneTree    | 2015-04-17    | 2015-06-19   | 2015-09-17   |
| 26    | 2015 | MO    | Troth       | 2015-04-14    | 2015-06-10   | 2015-09-10   |
| 27    | 2015 | ND    | Amenia      | 2015-04-24    | 2015-06-14   | 2015-09-17   |
| 28    | 2015 | ND    | Durbin      | 2015-04-24    | 2015-06-18   | 2015-09-16   |
| 29    | 2015 | NE    | Brandes     | 2015-04-19    | 2015-06-29   | 2015-10-12   |
| 30    | 2015 | NE    | SCAL        | 2015-04-24    | 2015-06-24   | 2015-10-08   |
| 31    | 2015 | WI    | Belmont     | 2015-05-04    | 2015-07-01   | 2015-10-21   |
| 32    | 2015 | WI    | Darlington  | 2015-05-04    | 2015-07-01   | 2015-10-21   |
| 33    | 2016 | IA    | Crawford    | 2016-04-26    | 2016-06-20   | 2016-10-30   |
| 34    | 2016 | IA    | Story       | 2016-05-12    | 2016-06-28   | 2016-10-19   |
| 35    | 2016 | IL    | Shumway     | 2016-04-25    | 2016-06-16   | 2016-09-21   |
| 36    | 2016 | IL    | Urbana      | 2016-04-19    | 2016-06-13   | 2016-09-27   |
| 37    | 2016 | IN    | Loam        | 2016-05-20    | 2016-06-28   | 2016-10-12   |
| 38    | 2016 | IN    | Sand        | 2016-05-20    | 2016-06-28   | 2016-10-16   |
| 39    | 2016 | MN    | Becker      | 2016-04-27    | 2016-06-22   | 2016-10-14   |
| 40    | 2016 | MN    | Waseca      | 2016-05-06    | 2016-06-27   | 2016-10-24   |

|    |      |    |          |            |            |            |
|----|------|----|----------|------------|------------|------------|
| 41 | 2016 | MO | Bradford | 2016-04-16 | 2016-06-13 | 2016-10-03 |
| 42 | 2016 | MO | Loess    | 2016-04-06 | 2016-06-06 | 2016-09-27 |
| 43 | 2016 | MO | Troth    | 2016-04-13 | 2016-06-03 | 2016-09-27 |
| 44 | 2016 | ND | Amenia   | 2016-05-06 | 2016-06-17 | 2016-10-07 |
| 45 | 2016 | ND | Durbin   | 2016-05-06 | 2016-06-21 | 2016-10-16 |
| 46 | 2016 | NE | Kyes     | 2016-05-05 | 2016-06-21 | 2016-09-29 |
| 47 | 2016 | NE | SCAL     | 2016-05-12 | 2016-06-28 | 2016-10-18 |
| 48 | 2016 | WI | Lorenzo  | 2016-04-23 | 2016-06-27 | 2016-10-24 |
| 49 | 2016 | WI | Plano    | 2016-04-23 | 2016-06-30 | 2016-10-24 |

**Table S2** Summary of vegetation index distribution and correlation analysis with corn yield in calibration database from 2014 to 2016 in US Midwest Corn Belt.

| Vegetation index    | Distribution summary |       |       | Correlation (r) with yield |
|---------------------|----------------------|-------|-------|----------------------------|
|                     | Mean                 | Max   | Min   |                            |
| DATT                | 0.61                 | 0.84  | 0.43  | 0.61                       |
| MND                 | 0.44                 | 0.72  | 0.27  | 0.61                       |
| NREI                | 0.29                 | 0.36  | 0.25  | -0.61                      |
| MTCI                | 1.58                 | 5.17  | 0.74  | 0.59                       |
| MRESR               | 2.58                 | 6.17  | 1.74  | 0.59                       |
| MRETVI              | 0.10                 | 0.33  | -0.08 | 0.58                       |
| MDD                 | 0.08                 | 0.25  | -0.04 | 0.58                       |
| MCCCI               | 0.47                 | 0.78  | 0.30  | 0.57                       |
| RERVI               | 2.15                 | 2.66  | 1.20  | 0.57                       |
| CIRE                | 1.15                 | 1.66  | 0.20  | 0.57                       |
| REWDRVI             | -0.59                | -0.52 | -0.75 | 0.56                       |
| MSR_RE              | 0.64                 | 0.87  | 0.14  | 0.55                       |
| REVI <sub>opt</sub> | 75.34                | 97.79 | 18.58 | 0.54                       |
| MCARI1/OSAVI        | 0.49                 | 1.07  | 0.16  | 0.54                       |
| MCARI1              | 0.33                 | 0.77  | 0.03  | 0.54                       |
| RETVI               | 7.66                 | 19.35 | 0.50  | 0.54                       |
| NDRE                | 0.36                 | 0.45  | 0.09  | 0.53                       |
| REOSAVI             | 0.33                 | 0.42  | 0.08  | 0.53                       |
| RESAVI              | 0.30                 | 0.42  | 0.07  | 0.51                       |
| MRESAVI             | 0.28                 | 0.42  | 0.06  | 0.51                       |
| RERDVI              | 0.28                 | 0.43  | 0.07  | 0.50                       |
| NNIRI               | 0.62                 | 0.69  | 0.41  | 0.46                       |
| REDVI               | 0.22                 | 0.47  | 0.05  | 0.45                       |
| SAVI*SR             | 2.74                 | 5.48  | -0.59 | 0.41                       |
| MSAVI               | 0.57                 | 0.73  | 0.15  | 0.40                       |
| RVI                 | 8.68                 | 14.31 | 1.61  | 0.38                       |
| SAVI                | 0.55                 | 0.72  | 0.17  | 0.38                       |
| MSR                 | 2.39                 | 3.40  | 0.38  | 0.37                       |
| WDRVI               | -0.01                | 0.26  | -0.68 | 0.37                       |

|                   |      |         |         |       |
|-------------------|------|---------|---------|-------|
| RDVI              | 0.52 | 0.72    | 0.16    | 0.37  |
| VI <sub>opt</sub> | 3.37 | 4.27    | 2.51    | 0.37  |
| MNLI              | 0.24 | 0.65    | -0.19   | 0.37  |
| OSAVI             | 0.66 | 0.76    | 0.20    | 0.36  |
| NLI               | 0.51 | 0.73    | -0.39   | 0.36  |
| DVI               | 0.36 | 0.71    | 0.10    | 0.35  |
| NDVI*RVI          | 0.27 | 0.68    | -0.31   | 0.34  |
| NDVI              | 0.76 | 0.87    | 0.23    | 0.33  |
| MCARI2            | 0.75 | 0.96    | 0.20    | 0.33  |
| TNDVI             | 1.12 | 1.17    | 0.86    | 0.33  |
| NRI               | 0.08 | 0.25    | 0.05    | -0.32 |
| RENDVI            | 0.57 | 0.72    | 0.14    | 0.26  |
| RESR              | 3.94 | 6.02    | 1.31    | 0.24  |
| MTCARI            | 0.19 | 0.44    | 0.06    | 0.22  |
| MNDRE             | 0.70 | 2.40    | 0.48    | -0.18 |
| MCARI2/OSAVI      | 1.13 | 1.33    | 0.85    | 0.16  |
| MTCARI/OSAVI      | 0.29 | 0.73    | 0.16    | -0.14 |
| MERIS             | 0.23 | 0.49    | 0.16    | 0.09  |
| MEVI              | 3.33 | 229.41  | -40.37  | -0.05 |
| MREDVI            | 0.14 | 0.26    | 0.05    | 0.02  |
| MCARI1/MRETVI     | 4.35 | 1352.48 | -437.14 | 0.01  |
| MTCARI/MRETVI     | 3.95 | 2083.12 | -390.43 | 0.00  |

**Note:** The formulas and explanations of all vegetation indices were detailed in Lu et al. (2017).

**Table S3** Evaluation of IRSCS performance with and without FNR-based threshold anchoring under different environmental and management conditions.

| Strategy                            | Vegetation index | RMSE (kg N ha <sup>-1</sup> ) | Blocks within $\pm 45$ kg N ha <sup>-1</sup> of EONR (%) | Difference from RSCS (percentage points) |
|-------------------------------------|------------------|-------------------------------|----------------------------------------------------------|------------------------------------------|
| RSCS                                | NDVI             | 64                            | 69                                                       | -                                        |
| IRSCS (threshold + bias correction) |                  | 62                            | 74                                                       | +5                                       |
| IRSCS (bias correction only)        |                  | 63                            | 73                                                       | +4                                       |
| RSCS                                | NDRE             | 65                            | 65                                                       | -                                        |
| IRSCS (threshold + bias correction) |                  | 65                            | 69                                                       | +4                                       |
| IRSCS (bias correction only)        |                  | 65                            | 68                                                       | +3                                       |
| RSCS                                | DATT             | 65                            | 65                                                       | -                                        |
| IRSCS (threshold + bias correction) |                  | 66                            | 67                                                       | +2                                       |
| IRSCS (bias correction only)        |                  | 66                            | 66                                                       | +1                                       |

**Note:** RSCS as baseline refers to the original vegetation index–based recommendation.

IRSCS (threshold + bias correction) represents the full IRSCS strategy, in which the recommendation range was constrained by the FNR-based threshold window and further

adjusted using  $G \times E \times M$ -based bias correction rules.

IRSCS (bias correction only) represents a sensitivity analysis in which the FNR-based threshold window was removed and only the  $G \times E \times M$ -based bias correction rules were retained.

Blocks within  $\pm 45 \text{ kg N ha}^{-1}$  of EONR (%) indicates the percentage of blocks for which the absolute difference between the predicted N rate and the economic optimal nitrogen rate (EONR) was within  $45 \text{ kg N ha}^{-1}$ .

Difference from RSCS (%) represents the change in percentage points relative to the baseline RSCS.

**Table S4** Comprehensive decision matrix of threshold refinement and bias-correction rules used in the IRSCS framework.

| Water regime | Pre-sidedress weather | CRM (days) | Threshold window ( $\text{kg N ha}^{-1}$ ) | Bias correction           | Notes                                            |
|--------------|-----------------------|------------|--------------------------------------------|---------------------------|--------------------------------------------------|
| Rainfed      | Dry                   | All        | FNR - 135 to FNR + 45                      | -45 $\text{kg N ha}^{-1}$ | Dry conditions tended to overpredict EONR        |
| Rainfed      | Wet                   | $\geq 105$ | FNR - 135 to FNR + 45                      | +45 $\text{kg N ha}^{-1}$ | Wet + long maturity tended to underpredict       |
| Rainfed      | Wet                   | $< 105$    | FNR - 135 to FNR + 45                      | -45 $\text{kg N ha}^{-1}$ | Wet + short maturity tended to overpredict       |
| Rainfed      | Normal                | All        | FNR - 135 to FNR + 45                      | 0                         | Default scenario                                 |
| Irrigated    | All                   | All        | FNR - 45 to FNR + 45                       | 0                         | Narrower threshold used to reduce extreme values |

**Note:** Pre-sidedress weather was classified using the precipitation normality index (PNI), defined as the ratio of cumulative precipitation during the pre-sidedress period to the long-term normal for the same period (see Section 2.5). Conditions were categorized as Dry, Normal, or Wet. CRM denotes crop relative maturity, and “All” indicates that the rule applies across all maturity classes. The threshold window defines the allowable range relative to FNR, and the bias correction indicates the fixed adjustment applied under each scenario

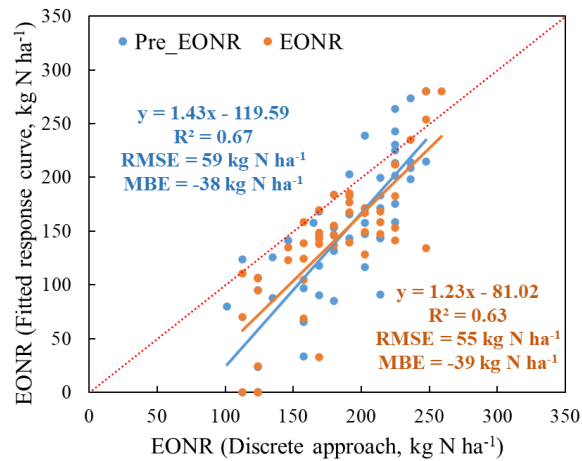

**Figure S1** Comparison between discrete and fitted economically optimal nitrogen rates. Pre-EONR represents the economically optimal N rate determined from pre-plant N treatments, while EONR represents the final economically optimal N rate considering total N (pre-plant + sidedress). Discrete Pre-EONR and EONR were derived from the treatment means observed in this study, whereas the fitted economically optimal N rates were obtained from Ransom et al. (2021) based on response curve fitting. The dashed line indicates the 1:1 relationship. Overall, the fitted optima were generally lower than the discrete optima, while the two approaches showed moderate agreement ( $R^2 = 0.63$ – $0.67$ ).

## Reference

- Lu, J., Miao, Y., Shi, W., Li, J., Yuan, F., 2017. Evaluating different approaches to non-destructive nitrogen status diagnosis of rice using portable RapidSCAN active canopy sensor. *Sci. Rep.* 7, 14073.
- Ransom, C.J., Clark, J., Bean, G.M., Bandura, C., Shafer, M.E., Kitchen, N.R., Camberato, J.J., Carter, P.R., Ferguson, R.B., Fernández, F., 2021. Data from a public–industry partnership for enhancing corn nitrogen research. *Agron. J.* 113, 4429–4436.
